# Supplementary material for: A decoupler-free simple paper microchip capillary electrophoresis device for simultaneous detection of dopamine, epinephrine and serotonin
Source: Royal Society of Chemistry journal article supplement (doi:10.1039/d0ra03526b), 2020-01-01

## Electronic Supplementary Information

**A decoupler-free simple paper microchip capillary electrophoresis device for  
simultaneous detection of dopamine, epinephrine and serotonin**

**Appan Roychoudhury,<sup>a,b</sup> Kevin Antony Francis,<sup>a,b</sup> Jay Patel,<sup>c</sup> Sandeep Kumar Jha<sup>a,b</sup> and  
Suddhasatwa Basu<sup>d</sup>**

*<sup>a</sup>Centre for Biomedical Engineering, Indian Institute of Technology Delhi, Hauz Khas, New  
Delhi 110016, India*

*<sup>b</sup>Department of Biomedical Engineering, All India Institute of Medical Sciences, New Delhi  
110029, India*

*<sup>c</sup>Department of Chemical Engineering, Visvesvaraya National Institute of Technology, Nagpur  
440010, India*

*<sup>d</sup>Department of Chemical Engineering, Indian Institute of Technology Delhi, Hauz Khas, New  
Delhi 110016, India*

**Fig. S1** Square wave voltammograms of **(A)** dopamine; **(B)** epinephrine; and **(C)** serotonin in PBS (50 mM, pH 7.0, 0.9% NaCl).

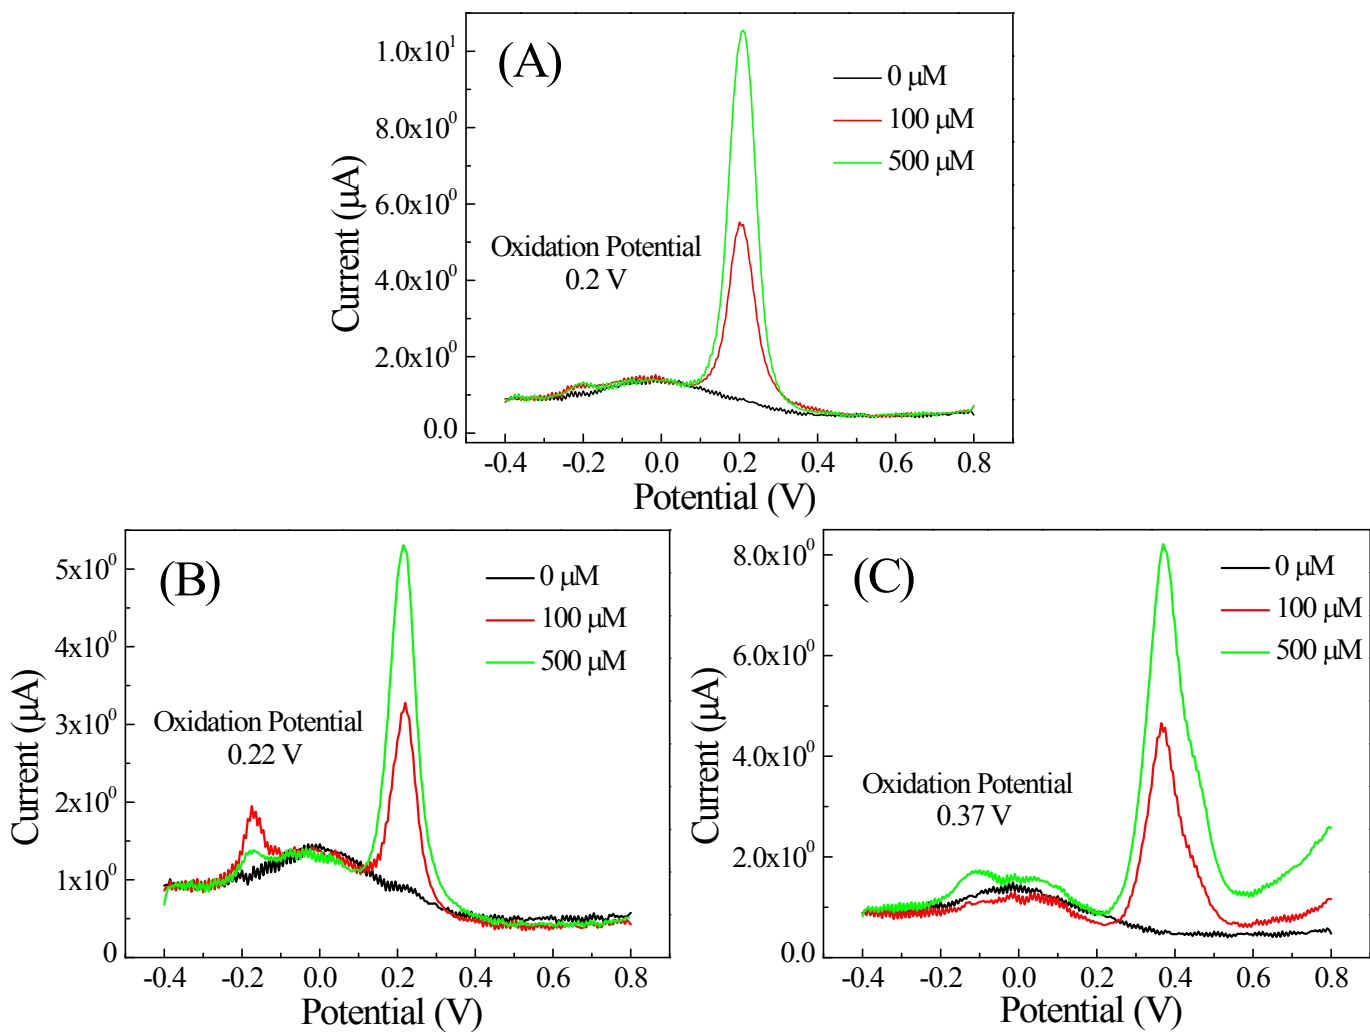

**Fig. S2** Differential pulse voltammograms of **(A)** dopamine; **(B)** epinephrine; and **(C)** serotonin in PBS (50 mM, pH 7.0, 0.9% NaCl).

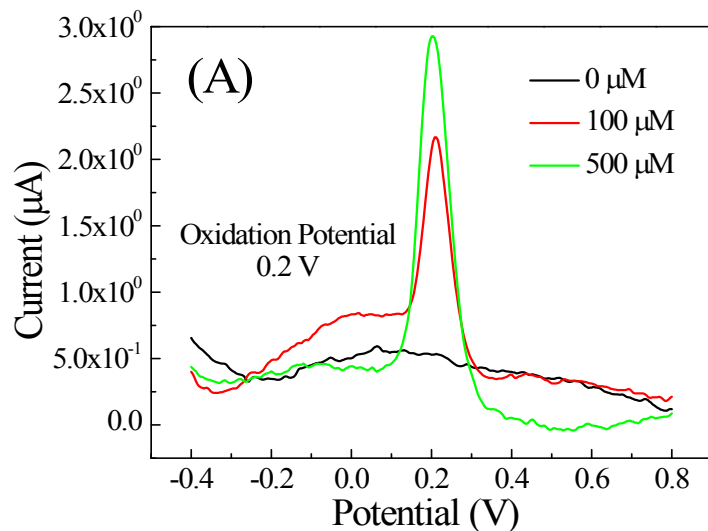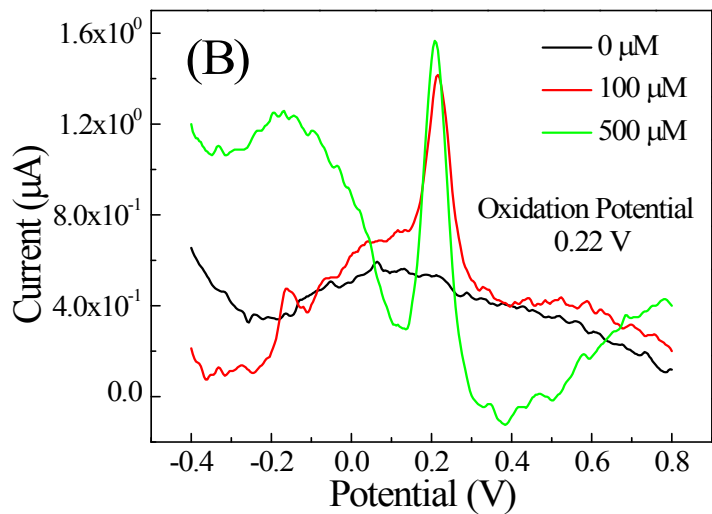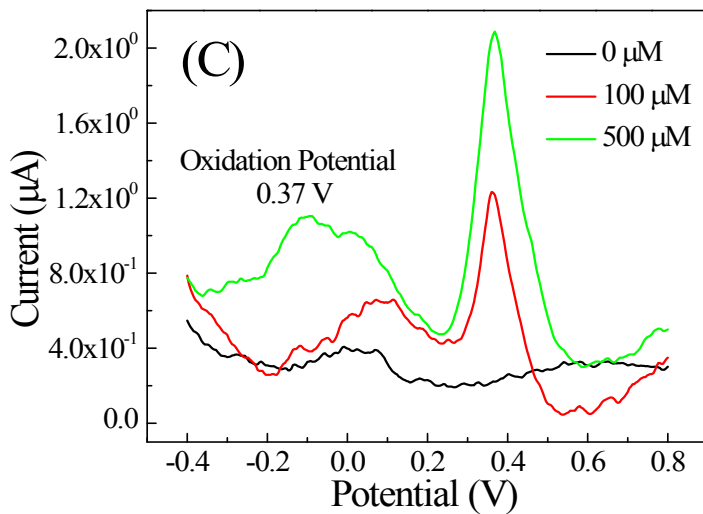

**Fig. S3** Electropherograms for analysis of **(A)** blank fetal bovine serum (FBS) sample; and **(B)** FBS sample spiked with 50  $\mu\text{M}$  each of dopamine, epinephrine and serotonin.

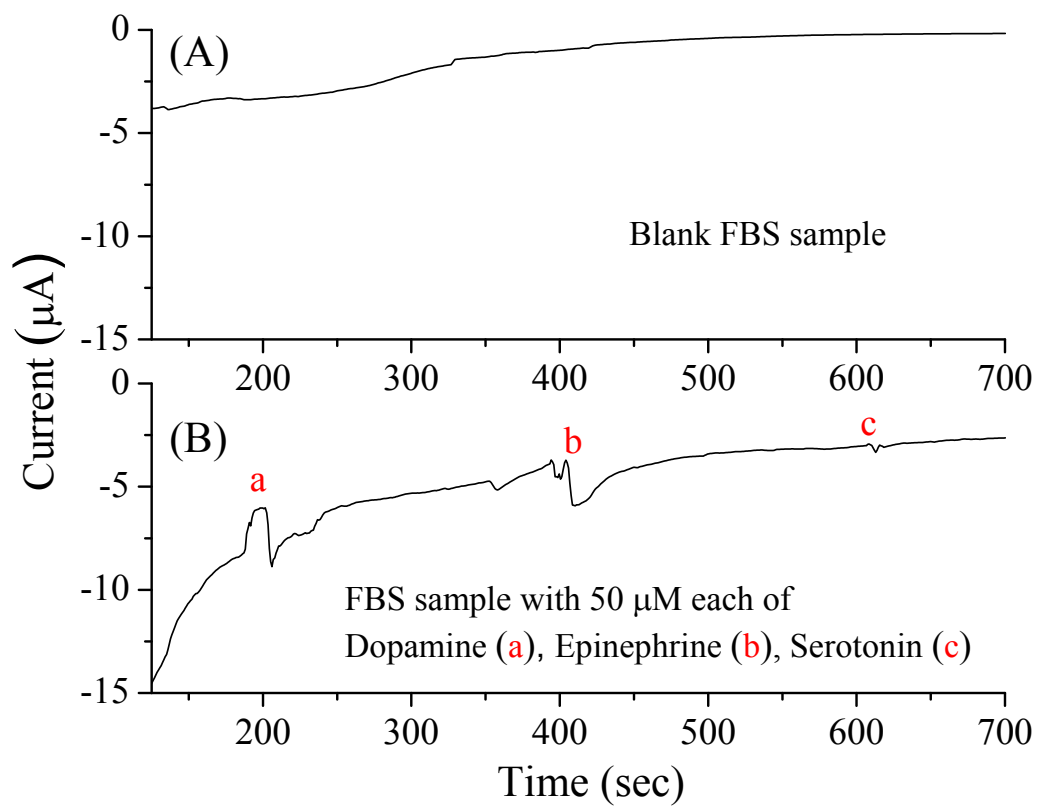

Supplement: d0ra03526b1.pdf [file d0ra03526b1.pdf]
